# Supplementary material for: Overexpression of Pear (Pyrus pyrifolia) CAD2 in Tomato Affects Lignin Content
Source: MDPI journal article supplement (doi:10.3390/molecules24142595), 2019-07-17
Supplement: s1 [file s1]

transgenic plants after transfer to soil.

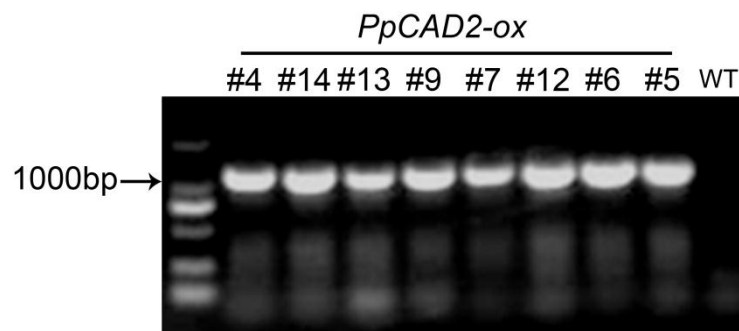

**Figure S3.** PCR identification of transgenic ‘Micro-Tom’ plants with the PpCAD2 constructs.
